**Table S3** : GenBank numbers for the sequences used in the phylogenetic analyses

| Genus                           | Species                                | Accession          | <i>ITS</i> | <i>matK</i> | <i>CYP1</i>                                  | <i>eiFla</i>                        | <i>SUS</i>                          | <i>TIP1;1</i>                                |
|---------------------------------|----------------------------------------|--------------------|------------|-------------|----------------------------------------------|-------------------------------------|-------------------------------------|----------------------------------------------|
|                                 | <i>A. afraspera</i>                    | LSTM1              | FM242584*  | KT821176*   | MF177955<br>MF177956<br>MF177957<br>MF177958 | KT821096*<br>KT821097*<br>KT821098* | KT821123*<br>KT821124*<br>KT821125* | MF281545<br>MF281546<br>MF281547<br>MF281548 |
|                                 | <i>A. americana</i>                    | PI544122           | FM242590*  | MF281585    | MF177961                                     | MF177991                            | MF178021                            | MF281551                                     |
|                                 | <i>A. aspera</i>                       | IRRI013020         | FM242623*  | KT821181*   |                                              |                                     |                                     |                                              |
|                                 | <i>A. ciliata</i>                      | IRRI013078         | FM242624*  | MF281598    |                                              |                                     |                                     |                                              |
|                                 | <i>A. crassicaulis</i>                 | LSTM13             | FM242594*  | KT821185*   |                                              |                                     |                                     |                                              |
|                                 | <i>A. cristata</i>                     | ILRI16880          | KT821169*  | KT821206*   |                                              |                                     |                                     |                                              |
|                                 | <i>A. deamii</i>                       | LSTM24             | KC540625*  | MF281594    | KC899136*                                    | KC899151*                           | KC899182*                           | MF281553                                     |
|                                 | <i>A. deightonii</i>                   | Lopez Poveda 204   | MF281641   | MF281612    |                                              |                                     |                                     |                                              |
|                                 | <i>A. denticulata</i>                  | IRRI13003          | FM242626*  | MF281599    |                                              |                                     |                                     |                                              |
|                                 | <i>A. elaphroxylon</i>                 | LSTM112            | KC540624*  | KT821187    |                                              |                                     |                                     |                                              |
|                                 | <i>A. evenia</i> ssp. <i>evenia</i>    | CIAT22838          | KC163299*  | KT821190*   | KC163219*                                    | KC163232*                           | KC163271*                           | MF281555                                     |
|                                 | <i>A. evenia</i> ssp. <i>serrulata</i> | IRFL6945           | KC163288*  | MF281601    |                                              |                                     |                                     |                                              |
|                                 | <i>A. filosa</i>                       | CIAT22466          | KC540623*  | MF281596    | KC899134*                                    | KC899149*                           | KC899180*                           | MF281554                                     |
|                                 | <i>A. fluitans</i>                     | CPI052338          | KC540622*  | KT821207*   |                                              |                                     |                                     |                                              |
|                                 | <i>A. fluminensis</i>                  | LSTM17             | FM242598*  | MF281588    | MF177962                                     | MF177992                            | MF178022                            | MF281552                                     |
|                                 | <i>A. indica</i> 4x                    | PI196206           | FM242601*  | MF281604    |                                              |                                     |                                     |                                              |
|                                 | <i>A. indica</i> 6x (Africa)           | LSTM19             | KC899205*  | MF281605    |                                              |                                     |                                     |                                              |
|                                 | <i>A. indica</i> 6x (Australia)        | PI 257662          | MG257910*  | MH325202    |                                              |                                     |                                     |                                              |
|                                 | <i>A. mediocris</i>                    | Bingham 10508      | MF281642   | MF281613    |                                              |                                     |                                     |                                              |
| <i>Aeschynomene</i><br>subgenus | <i>A. montevidensis</i>                | LSTM131            | KC540621*  | MF281590    | MF177963                                     | MF177994                            | MF178024                            | MF281556                                     |
| <i>Aeschynomene</i>             | <i>A. nilotica</i>                     | IRRI014040         | KC560767*  | KT821193*   |                                              |                                     |                                     |                                              |
|                                 | <i>A. paraguayensis</i>                | T.M. Pedersen 9301 | MF281635   | MF281591    |                                              |                                     |                                     |                                              |
|                                 | <i>A. parviflora</i>                   | IRFL02854          | KC540620*  | MF281589    |                                              |                                     |                                     |                                              |

|                                                        |                          |               |           |           |          |           |           |          |
|--------------------------------------------------------|--------------------------|---------------|-----------|-----------|----------|-----------|-----------|----------|
|                                                        | <i>A. pfundii</i>        | LSTM54        | FM242629* | KT821195* |          |           |           |          |
|                                                        | <i>A. pratensis</i>      | IRRI13006     | FM242630* | MF281611  |          |           |           |          |
|                                                        | <i>A. rostrata</i>       | 600445344     | MF281638* | MF281595  |          |           |           |          |
|                                                        | <i>A. rudis</i>          | LSTM56        | FM242631* | MF281606  |          |           |           |          |
|                                                        | <i>A. scabra</i>         | PI296044      | FM242604* | MF281607  |          |           |           |          |
|                                                        | <i>A. schimperi</i> 4x   | IRRI012146    | FM242625* | KT821186* |          |           |           |          |
|                                                        | <i>A. schimperi</i> 4x   | ILRI000659    | KT821160* | KT821196* |          |           |           |          |
|                                                        | <i>A. schimperi</i> 8x   | IRRI012156    | FM242633* | KT821199* |          |           |           |          |
|                                                        | <i>A. schimperi</i> 8x   | ILRI013814    | KT821166* | KT821203* |          |           |           |          |
|                                                        | <i>A. selloi</i>         | CPI104040     | KC899207* | MF281610  |          |           |           |          |
|                                                        | <i>A. sensitiva</i>      | LSTM28        | FM242607* | MF281609  |          |           |           |          |
|                                                        | <i>A. sp</i> (328)       | CIAT 8499     | MG257911* | MH325203  |          |           |           |          |
|                                                        | <i>A. sp</i> (353)       | AusTCFC 84952 | MG257912* | MH325204  |          |           |           |          |
|                                                        | <i>A. tambacoudensis</i> | LSTM60        | FM242634* | MF281597  |          |           |           |          |
|                                                        | <i>A. uniflora</i>       | IRRI013158    | FM242635* | KT821207* | MF177959 | KT821121* | KT821148* | MF281549 |
|                                                        |                          |               |           |           | MF177960 | KT821122* | KT821149* | MF281550 |
|                                                        | <i>A. unijuga</i>        | Jalisco 1952  | MF281634  | MF281587  |          |           |           |          |
|                                                        | <i>A. villosa</i>        | PI546550      | FM242619* | MF281586  |          |           |           |          |
|                                                        | <i>A. virginica</i>      | LSTM63        | KC560766* | MF281608  |          |           |           |          |
| <i>Aeschynomene</i><br>subgenus<br><i>Bakerophyton</i> | <i>A. lateritia</i>      | 8384          | -         | MF281628  |          |           |           |          |
|                                                        | <i>A. pulchella</i>      | 32798         | MF281654  | MF281627  |          |           |           |          |
|                                                        | <i>A. abyssinica</i>     | ILRI13761     | MF281650  | MF281622  | MF177977 | MF178005  | MF178036  | MF281571 |
|                                                        |                          |               |           |           | MF177978 | MF178006  |           | MF281572 |
|                                                        | <i>A. abyssinica</i>     | ILRI7705      | MF281651  | MF281623  |          |           |           |          |
| <i>Aeschynomene</i><br>subgenus <i>Rueppellia</i>      | <i>A. bella</i>          | ILRI18422     | KC540628* | MF281624  | MF177975 | MF178007  | MF178037  | MF281569 |
|                                                        |                          |               |           |           | MF177976 | MF178008  |           | MF281570 |
|                                                        | <i>A. heurckeanae</i>    | LSTM310       | MF281652  | MF281625  |          |           |           |          |
|                                                        | <i>A. pigmaea</i>        | LSTM321       | MF281653  | MF281626  |          |           |           |          |

|                                     |                              |            |           |           |                      |                      |                      |                      |
|-------------------------------------|------------------------------|------------|-----------|-----------|----------------------|----------------------|----------------------|----------------------|
| <i>Aeschynomene</i><br>unclassified | <i>A. patula</i>             | CPI052332  | MF281636  | MF281592  | MF177964             | MF177993             | MF178023             | MF281557             |
|                                     | <i>A. schindleri</i>         | P001468    | MF281637  | MF281593  |                      |                      |                      |                      |
| <i>Bryaspis</i>                     | <i>B. humularioides</i>      | Burgt 1734 | MF281647  | MF281619  | MF177985<br>MF177986 | MF178015<br>MF178016 | MF178043<br>MF178044 | MF281579<br>MF281580 |
|                                     | <i>B. lupulina</i>           | KG369400   | MF281646  | MF281618  | MF177983<br>MF177984 | MF178013<br>MF178014 | MF178041<br>MF178042 | MF281577<br>MF281578 |
| <i>Cyclocarpa</i>                   | <i>C. stellaris</i>          | KG246518   | MF281644  | MF281615  | MF177966<br>MF177967 | MF177996<br>MF177997 | MF178026<br>MF178027 | MF281559<br>MF281560 |
| <i>Geissaspis</i>                   | <i>G. cristata</i>           |            | MF281648  | MF281620  | MF177987<br>MF177988 | MF178017<br>MF178018 | MF178045<br>MF178046 | MF281581<br>MF281582 |
|                                     | <i>G. tenella</i>            |            | MF281649  | MF281621  | MF177989<br>MF177990 | MF178019<br>MF178020 | MF178047<br>MF178048 | MF281583<br>MF281584 |
| <i>Humularia</i>                    | <i>H. descampsii</i>         | ILRI16882  | MF281657  | MF281632  | MF177971<br>MF177972 | MF178001<br>MF178002 | MF178032<br>MF178033 | MF281565<br>MF281566 |
|                                     | <i>H. kapiiriensis</i>       |            | MF281658  | MF281633  | MF177973<br>MF177974 | MF178003<br>MF178004 | MF178034<br>MF178035 | MF281567<br>MF281568 |
| <i>Kotschya</i>                     | <i>K. africana</i>           |            | MF281655  | MF281630  |                      |                      |                      |                      |
|                                     | <i>K. lutea</i>              |            | KC560762* | MF281629  | MF177979<br>MF177980 | MF178009<br>MF178010 | MF178038<br>MF178039 | MF281573<br>MF281574 |
|                                     | <i>K. strigosa</i>           |            | MF281656  | MF281631  | MF177981<br>MF177982 | MF178011<br>MF178012 | MF178040<br>MF178041 | MF281575<br>MF281576 |
| <i>Smithia</i>                      | <i>S. abyssinica</i>         | ILRI8360   | KC560763* | MF281616  | MF177968             | MF177998             | MF178028<br>MF178029 | MF281561<br>MF281562 |
|                                     | <i>S. sensitiva</i>          | ILRI23833  | MF281645  | MF281617  | MF177969<br>MF177970 | MF177999<br>MF178000 | MF178030<br>MF178031 | MF281563<br>MF281564 |
| <i>Soemmeringia</i>                 | <i>S. semperflorens</i>      | CIAT9844   | MF281643  | MF281614  | MF177965             | MF177995             | MF178025             | MF281558             |
| Outgroup                            | <i>Pictetia angustifolia</i> |            | AF068171* | AF203579* |                      |                      |                      |                      |

\*: Sequences previously published in Chaintreuil *et al.*, 2013, 2016a, 2018 and Arrighi *et al.*, 2012, 2013, 2014 or directly retrieved from GeneBank.
